# Supplementary material
Source: ML conference proceedings conference paper supplement (https://proceedings.neurips.cc/paper_files/paper/2020/hash/55053683268957697aa39fba6f231c68-Abstract.html)
Supplement: Supplementary file [file 55053683268957697aa39fba6f231c68-Supplemental.zip]

# Setup

We provide the code as IPython notebooks. For ease of use, we recommend using Google Colab ([colab.research.google.com](https://colab.research.google.com)) to run all of the notebooks except `3d_shape_occupancy.ipynb`. The notebooks are designed to install libraries that the Colab environment is missing. To run in Colab, upload the file to [colab.research.google.com](https://colab.research.google.com) and enable the GPU in the runtime settings.

Install the following libraries if you would prefer to use your own local environment:

- JAX (GPU)
- jaxlib
- neural-tangents
- tqdm
- Livelossplot
- imageio
- PIL
- cv2
- numpy
- matplotlib
- phantominator
- gdown

To run `3d_shape_occupancy.ipynb` the additional libraries are necessary:

- Embree
- pyembree
- trimesh

# Included Files

`1d_regression.ipynb`: Main text Fig. 2,3 and supp. Fig. 8

`1d_scatter_plots.ipynb` : Main text Fig. 4 and supp. Fig. 9

`1d_ntk_opt.ipynb` : Supp. Fig. 1

`2d_image_regression.ipynb`: Main text Fig. 1, Table 1 and supp. Fig. 2,6,11 Table 2

`2d_CT.ipynb`: Main text Table 1 and supp. Fig. 13 Table 4

`2d_MRI.ipynb`: Main text Fig. 1, Table 1 and supp. Fig. 14 Table 5

`3d_shape_occupancy.ipynb`: Main text Fig. 1, Table 1, and supp. Fig. 12 Table 3

`3d_simple_nerf`: Main text Fig. 1, Table 1 and supp. Fig. 15 Table 6

`Kernel_spreading.ipynb` : Supp. Fig. 3

`toy_stationary_ex.ipynb` : Supp. Fig. 10

`axis_aligned_ex.ipynb`: Supp. Fig. 7
